# Supplementary material for: Milk exosomes with enhanced mucus penetrability for oral delivery of siRNA
Source: Royal Society of Chemistry journal article supplement (doi:10.1039/d0bm01497d), 2020-12-08
Supplement: d0bm01497d7.xlsx [file d0bm01497d7.xlsx]

## Sheet: Table S1 Protein quantification
In order for a peptide to be considered a good match it must meet the following criteria:
Ion Score: greater than or equal to 25
Isolation interference: Less than or equal to 30
Search engine rank: equal to 1
At the protein level we like for there to be more than 2 total peptides and/or 2 unique peptides.
ER Proteins			Count	Intensity		Total Protein Count	Exosome	Milk/Whey	ER	Golgi	Membrane	Extracellular
A8YXY3	15 kDa selenoprotein OS=Bos taurus GN=SEP15 PE=2 SV=2	ER protein folding	1	4.34304e+06			25	9	6	3	6	2	51
Q0VCX2	78 kDa glucose-regulated protein OS=Bos taurus GN=HSPA5 PE=2 SV=1	ER chaperone, protein folding quality control	1	2.66067e+06			49.0196	17.6471	11.7647	5.88235	11.7647	3.92157	100
Q27968	DnaJ homolog subfamily C member 3 OS=Bos taurus GN=DNAJC3 PE=1 SV=1	Protein response during ER stress; co-chaperone to HSC70	1	1.42689e+07
Q3SZU5	Signal peptidase complex subunit 3 OS=Bos taurus GN=SPCS3 PE=2 SV=1	Protein tartgeting to ER	1	2.63525e+06
Q3MHX6	Protein OS-9 OS=Bos taurus GN=OS9 PE=2 SV=1	Lectin which functions in ER quality control and ER-associated degradation	1	8.25529e+07		Spectrum Intensity (out of 51)	Exosome	Milk/Whey	ER	Golgi	Membrane	Extracellular
Q32KV6	Nucleotide exchange factor SIL1 OS=Bos taurus GN=SIL1 PE=2 SV=1	Protein translocation and folding in ER	1	8.26952e+06			4.7903e+09	6.71717e+10	1.1473e+08	1.12463e+08	4.10291e+09	8.40644e+06	7.63005e+10
			6	1.1473e+08			6.2782	88.0357	0.150366	0.147394	5.3773	0.0110175	100
Golgi Proteins
Q3T000	Synaptobrevin homolog YKT6 OS=Bos taurus GN=YKT6 PE=2 SV=1	ER to Golgi vesicle transport	1	4.61839e+06		Spectrum Intensity (out of 132)	Exosome	Milk/Whey	ER	Golgi	Membrane	Extracellular
Q5E9I6; P84080	ADP-ribosylation factor 3 OS=Bos taurus GN=ARF3 PE=2 SV=3; ADP-ribosylation factor 1 OS=Bos taurus GN=ARF1 PE=1 SV=2	Protein trafficking & vesicle budding within Golgi	1	4.06392e+06			4.7903e+09	6.71717e+10	1.1473e+08	1.12463e+08	4.10291e+09	8.40644e+06	8.54621e+10
P08037	Beta-1,4-galactosyltransferase 1 OS=Bos taurus GN=B4GALT1 PE=1 SV=3	Golgi complex catalyzes lactose production in mammary gland	1	1.0378e+08			5.60518	78.5983	0.134247	0.131594	4.80085	0.00983646	89.28
			3	1.12463e+08
Transmembrane
Q1RMJ6; Q3ZBW5; P61585	Rho-related GTP-binding protein RhoC OS=Bos taurus GN=RHOC PE=2 SV=1; Rho-related GTP-binding protein RhoB OS=Bos taurus GN=RHOB PE=2 SV=1; Transforming protein RhoA OS=Bos taurus GN=RHOA PE=1 SV=1	Actin regulation - related plasma membrane receptor	1	8.48571e+06
P81265	Polymeric immunoglobulin receptor OS=Bos taurus GN=PIGR PE=2 SV=1	Transmembrane protein	1	2.38621e+09
P62871; P11017	Guanine nucleotide-binding protein G(I)/G(S)/G(T) subunit beta-1 OS=Bos taurus GN=GNB1 PE=1 SV=3; Guanine nucleotide-binding protein G(I)/G(S)/G(T) subunit beta-2 OS=Bos taurus GN=GNB2 PE=2 SV=3	G-proteins – presence of membranes	1	1.37925e+07
Q9XSJ4	Alpha-enolase OS=Bos taurus GN=ENO1 PE=1 SV=4	Cell memrbane receptor, immunoglobulin production	1	2.75785e+06
P18892	Butyrophilin subfamily 1 member A1 OS=Bos taurus GN=BTN1A1 PE=1 SV=2	Membrane protein, secretion of milk-fat droplets	1	1.52196e+09
Q4GZT4	ATP-binding cassette sub-family G member 2 OS=Bos taurus GN=ABCG2 PE=3 SV=2	Transportation of urate from mito to cell membrane and out of cell	1	1.69701e+08
			6	4.10291e+09
Extracelluluar
P29392	Spermadhesin-1 OS=Bos taurus GN=SPADH1 PE=1 SV=1	Growth Factor	1	3.89805e+06
P07589	Fibronectin OS=Bos taurus GN=FN1 PE=1 SV=4	ECM protein, cell shape, indicates membrane binding	1	4.50839e+06
			2	8.40644e+06
Exosome
P0CH28; P63048; P62992; P0CG53	Polyubiquitin-C OS=Bos taurus GN=UBC PE=1 SV=1; Ubiquitin-60S ribosomal protein L40 OS=Bos taurus GN=UBA52 PE=1 SV=2; Ubiquitin-40S ribosomal protein S27a OS=Bos taurus GN=RPS27A PE=1 SV=2; Polyubiquitin-B OS=Bos taurus GN=UBB PE=1 SV=1	Ubiquitin – involved in ESCRT	1	1.56338e+07
Q3ZBV1	IST1 homolog OS=Bos taurus GN=IST1 PE=2 SV=1	Involved in ESCRT-III machinery	1	2.75599e+06
P10096	Glyceraldehyde-3-phosphate dehydrogenase OS=Bos taurus GN=GAPDH PE=1 SV=4	RNA transport	1	2.22178e+06
Q32PH8; P68103	Elongation factor 1-alpha 2 OS=Bos taurus GN=EEF1A2 PE=2 SV=1; Elongation factor 1-alpha 1 OS=Bos taurus GN=EEF1A1 PE=1 SV=1	translation, ribosomes for protein biosynthesis	1	7.17906e+06
P31976	Ezrin OS=Bos taurus GN=EZR PE=1 SV=2	Cytoskeletal	1	4.20589e+06
Q2HJ49; Q32LP2; P31976	Moesin OS=Bos taurus GN=MSN PE=2 SV=3; Radixin OS=Bos taurus GN=RDX PE=2 SV=1; Ezrin OS=Bos taurus GN=EZR PE=1 SV=2		1	1.91828e+07
P50397	Rab GDP dissociation inhibitor beta OS=Bos taurus GN=GDI2 PE=2 SV=3	Rab proteins	1	2.66783e+07
P62998	Ras-related C3 botulinum toxin substrate 1 OS=Bos taurus GN=RAC1 PE=1 SV=1		1	6.33468e+06
Q9TU25; P62998	Ras-related C3 botulinum toxin substrate 2 OS=Bos taurus GN=RAC2 PE=2 SV=1; Ras-related C3 botulinum toxin substrate 1 OS=Bos taurus GN=RAC1 PE=1 SV=1		1	8.27539e+06
Q3MHP2; Q2TA29	Ras-related protein Rab-11B OS=Bos taurus GN=RAB11B PE=2 SV=3; Ras-related protein Rab-11A OS=Bos taurus GN=RAB11A PE=2 SV=3		1	1.70945e+07
Q1RMR4	Ras-related protein Rab-15 OS=Bos taurus GN=RAB15 PE=2 SV=1		1	9.90901e+06
Q0IIG8	Ras-related protein Rab-18 OS=Bos taurus GN=RAB18 PE=2 SV=1		1	3.90632e+07
Q2HJH2	Ras-related protein Rab-1B OS=Bos taurus GN=RAB1B PE=2 SV=1		1	2.62705e+07
Q3T0F5	Ras-related protein Rab-7a OS=Bos taurus GN=RAB7A PE=2 SV=1		1	4.13068e+06
Q95114	Lactadherin OS=Bos taurus GN=MFGE8 PE=1 SV=2	Common markers	1	2.15239e+09
P80025	Lactoperoxidase OS=Bos taurus GN=LPO PE=1 SV=1		1	5.42167e+08
P24627	Lactotransferrin OS=Bos taurus GN=LTF PE=1 SV=2		1	1.52731e+09
Q71SP7	Fatty acid synthase OS=Bos taurus GN=FASN PE=2 SV=1		1	4.47012e+07
Q3ZCD0	CD81 antigen OS=Bos taurus GN=CD81 PE=2 SV=1		1	3.35747e+07
P30932	CD9 antigen OS=Bos taurus GN=CD9 PE=2 SV=2		1	2.54114e+08
P19120	Heat shock cognate 71 kDa protein OS=Bos taurus GN=HSPA8 PE=1 SV=2		1	6.76973e+06
P04272	Annexin A2 OS=Bos taurus GN=ANXA2 PE=1 SV=2		1	2.04053e+06
P81287	Annexin A5 OS=Bos taurus GN=ANXA5 PE=1 SV=3		1	3.6775e+07
Q27975; Q27965	Heat shock 70 kDa protein 1A OS=Bos taurus GN=HSPA1A PE=1 SV=2; Heat shock 70 kDa protein 1B OS=Bos taurus GN=HSPA1B PE=2 SV=1		1	658786
P63103; Q0VC36; P68509; P68252; P68250; Q3SZI4; P62261	14-3-3 protein zeta/delta OS=Bos taurus GN=YWHAZ PE=1 SV=1; 14-3-3 protein sigma OS=Bos taurus GN=SFN PE=2 SV=1; 14-3-3 protein eta OS=Bos taurus GN=YWHAH PE=1 SV=2; 14-3-3 protein gamma OS=Bos taurus GN=YWHAG PE=1 SV=2; 14-3-3 protein beta/alpha OS=Bos taurus GN=YWHAB PE=1 SV=2; 14-3-3 protein theta OS=Bos taurus GN=YWHAQ PE=2 SV=1; 14-3-3 protein epsilon OS=Bos taurus GN=YWHAE PE=2 SV=1		1	866426
			25	4.7903e+09
Milk and Whey
P15497	Apolipoprotein A-I OS=Bos taurus GN=APOA1 PE=1 SV=3		1	4.49508e+06
Q03247	Apolipoprotein E OS=Bos taurus GN=APOE PE=1 SV=1		1	5.72538e+06
P02754	Beta-lactoglobulin OS=Bos taurus GN=LGB PE=1 SV=3		1	1.63176e+10
P02769	Serum albumin OS=Bos taurus GN=ALB PE=1 SV=4		1	7.5608e+08
P00711	Alpha-lactalbumin OS=Bos taurus GN=LALBA PE=1 SV=2		1	4.46422e+08
P02662	Alpha-S1-casein OS=Bos taurus GN=CSN1S1 PE=1 SV=2		1	1.53643e+10
P02663	Alpha-S2-casein OS=Bos taurus GN=CSN1S2 PE=1 SV=2		1	1.71424e+09
P02666	Beta-casein OS=Bos taurus GN=CSN2 PE=1 SV=2		1	3.67455e+09
P02668	Kappa-casein OS=Bos taurus GN=CSN3 PE=1 SV=1		1	2.88884e+10
			9	6.71717e+10

## Sheet: Summary All identified proteins
Protein Accessions	Protein Descriptions	Intensity	Spectrum File	TotPep	UniPep
A8YXY3	15 kDa selenoprotein OS=Bos taurus GN=SEP15 PE=2 SV=2	4.34304e+06	190329_636_MW_XY.raw	4	3
Q05927	5'-nucleotidase OS=Bos taurus GN=NT5E PE=1 SV=2	3.06278e+07	190329_636_MW_XY.raw	26	15
Q0VCX2	78 kDa glucose-regulated protein OS=Bos taurus GN=HSPA5 PE=2 SV=1	2.66067e+06	190329_636_MW_XY.raw	4	4
P60712; P63258	Actin, cytoplasmic 1 OS=Bos taurus GN=ACTB PE=1 SV=1; Actin, cytoplasmic 2 OS=Bos taurus GN=ACTG1 PE=1 SV=1	2.11404e+07	190329_636_MW_XY.raw	7	4
Q5E9B5; P60712; P62739; P68138; Q3ZC07; P63258	Actin, gamma-enteric smooth muscle OS=Bos taurus GN=ACTG2 PE=2 SV=1; Actin, cytoplasmic 1 OS=Bos taurus GN=ACTB PE=1 SV=1; Actin, aortic smooth muscle OS=Bos taurus GN=ACTA2 PE=1 SV=1; Actin, alpha skeletal muscle OS=Bos taurus GN=ACTA1 PE=1 SV=1; Actin, alpha cardiac muscle 1 OS=Bos taurus GN=ACTC1 PE=2 SV=1; Actin, cytoplasmic 2 OS=Bos taurus GN=ACTG1 PE=1 SV=1	1.47251e+07	190329_636_MW_XY.raw	6	3
Q5E9I6; P84080	ADP-ribosylation factor 3 OS=Bos taurus GN=ARF3 PE=2 SV=3; ADP-ribosylation factor 1 OS=Bos taurus GN=ARF1 PE=1 SV=2	4.06392e+06	190329_636_MW_XY.raw	3	1
Q3SZF2	ADP-ribosylation factor 4 OS=Bos taurus GN=ARF4 PE=2 SV=3	3.46072e+06	190329_636_MW_XY.raw	5	3
Q5EA79	Aldose 1-epimerase OS=Bos taurus GN=GALM PE=2 SV=1	1.80179e+06	190329_636_MW_XY.raw	2	2
Q7SIH1	Alpha-2-macroglobulin OS=Bos taurus GN=A2M PE=1 SV=2	2.63417e+06	190329_636_MW_XY.raw	5	4
Q9XSJ4	Alpha-enolase OS=Bos taurus GN=ENO1 PE=1 SV=4	2.75785e+06	190329_636_MW_XY.raw	4	4
Q3SZ57	Alpha-fetoprotein OS=Bos taurus GN=AFP PE=2 SV=1	2.69586e+07	190329_636_MW_XY.raw	3	1
P00711	Alpha-lactalbumin OS=Bos taurus GN=LALBA PE=1 SV=2	4.46422e+08	190329_636_MW_XY.raw	54	14
P02662	Alpha-S1-casein OS=Bos taurus GN=CSN1S1 PE=1 SV=2	1.53643e+10	190329_636_MW_XY.raw	124	14
P02663	Alpha-S2-casein OS=Bos taurus GN=CSN1S2 PE=1 SV=2	1.71424e+09	190329_636_MW_XY.raw	64	16
P04272	Annexin A2 OS=Bos taurus GN=ANXA2 PE=1 SV=2	2.04053e+06	190329_636_MW_XY.raw	2	2
P81287	Annexin A5 OS=Bos taurus GN=ANXA5 PE=1 SV=3	3.6775e+07	190329_636_MW_XY.raw	12	7
P15497	Apolipoprotein A-I OS=Bos taurus GN=APOA1 PE=1 SV=3	4.49508e+06	190329_636_MW_XY.raw	6	5
Q03247	Apolipoprotein E OS=Bos taurus GN=APOE PE=1 SV=1	5.72538e+06	190329_636_MW_XY.raw	6	3
Q4GZT4	ATP-binding cassette sub-family G member 2 OS=Bos taurus GN=ABCG2 PE=3 SV=2	1.69701e+08	190329_636_MW_XY.raw	49	20
P08037	Beta-1,4-galactosyltransferase 1 OS=Bos taurus GN=B4GALT1 PE=1 SV=3	1.0378e+08	190329_636_MW_XY.raw	18	8
P02666	Beta-casein OS=Bos taurus GN=CSN2 PE=1 SV=2	3.67455e+09	190329_636_MW_XY.raw	30	7
P02754	Beta-lactoglobulin OS=Bos taurus GN=LGB PE=1 SV=3	1.63176e+10	190329_636_MW_XY.raw	151	18
P18892	Butyrophilin subfamily 1 member A1 OS=Bos taurus GN=BTN1A1 PE=1 SV=2	1.52196e+09	190329_636_MW_XY.raw	152	32
Q17QE5	Calcium and integrin-binding protein 1 OS=Bos taurus GN=CIB1 PE=2 SV=1	5.26687e+06	190329_636_MW_XY.raw	3	3
P80209	Cathepsin D OS=Bos taurus GN=CTSD PE=1 SV=2	2.18896e+06	190329_636_MW_XY.raw	2	2
Q3ZCD0	CD81 antigen OS=Bos taurus GN=CD81 PE=2 SV=1	3.35747e+07	190329_636_MW_XY.raw	9	3
P30932	CD9 antigen OS=Bos taurus GN=CD9 PE=2 SV=2	2.54114e+08	190329_636_MW_XY.raw	15	6
Q5EAB4	Chitinase domain-containing protein 1 OS=Bos taurus GN=CHID1 PE=2 SV=1	5.99736e+06	190329_636_MW_XY.raw	6	5
P30922	Chitinase-3-like protein 1 OS=Bos taurus GN=CHI3L1 PE=1 SV=3	4.76738e+06	190329_636_MW_XY.raw	5	4
P17697	Clusterin OS=Bos taurus GN=CLU PE=1 SV=1	1.4899e+07	190329_636_MW_XY.raw	13	7
Q2UVX4	Complement C3 OS=Bos taurus GN=C3 PE=1 SV=2	2.12855e+09	190329_636_MW_XY.raw	323	94
P01030	Complement C4 (Fragments) OS=Bos taurus GN=C4 PE=1 SV=2	6.55939e+06	190329_636_MW_XY.raw	7	5
Q29RQ1	Complement component C7 OS=Bos taurus GN=C7 PE=2 SV=1	1.1048e+07	190329_636_MW_XY.raw	12	10
Q3MHN2	Complement component C9 OS=Bos taurus GN=C9 PE=2 SV=1	5.24524e+06	190329_636_MW_XY.raw	6	5
P81187	Complement factor B OS=Bos taurus GN=CFB PE=1 SV=2	1.91923e+07	190329_636_MW_XY.raw	13	9
A6QLZ7	Cysteine-rich secretory protein LCCL domain-containing 2 OS=Bos taurus GN=CRISPLD2 PE=2 SV=1	4.82865e+06	190329_636_MW_XY.raw	6	5
Q27968	DnaJ homolog subfamily C member 3 OS=Bos taurus GN=DNAJC3 PE=1 SV=1	1.42689e+07	190329_636_MW_XY.raw	11	8
P15396	Ectonucleotide pyrophosphatase/phosphodiesterase family member 3 OS=Bos taurus GN=ENPP3 PE=1 SV=2	2.96197e+07	190329_636_MW_XY.raw	19	13
Q32PH8; P68103	Elongation factor 1-alpha 2 OS=Bos taurus GN=EEF1A2 PE=2 SV=1; Elongation factor 1-alpha 1 OS=Bos taurus GN=EEF1A1 PE=1 SV=1	7.17906e+06	190329_636_MW_XY.raw	4	2
P79345	Epididymal secretory protein E1 OS=Bos taurus GN=NPC2 PE=1 SV=1	8.87054e+06	190329_636_MW_XY.raw	6	3
P31976	Ezrin OS=Bos taurus GN=EZR PE=1 SV=2	4.20589e+06	190329_636_MW_XY.raw	2	2
P50448	Factor XIIa inhibitor OS=Bos taurus PE=1 SV=1	1.03986e+07	190329_636_MW_XY.raw	9	3
Q71SP7	Fatty acid synthase OS=Bos taurus GN=FASN PE=2 SV=1	4.47012e+07	190329_636_MW_XY.raw	31	20
P10790	Fatty acid-binding protein, heart OS=Bos taurus GN=FABP3 PE=1 SV=2	5.39098e+08	190329_636_MW_XY.raw	84	9
P02672	Fibrinogen alpha chain OS=Bos taurus GN=FGA PE=1 SV=5	3.38188e+07	190329_636_MW_XY.raw	17	10
P02676	Fibrinogen beta chain OS=Bos taurus GN=FGB PE=1 SV=2	5.29718e+07	190329_636_MW_XY.raw	22	14
P12799	Fibrinogen gamma-B chain OS=Bos taurus GN=FGG PE=1 SV=1	7.37022e+07	190329_636_MW_XY.raw	25	12
Q9MZ06	Fibroblast growth factor-binding protein 1 OS=Bos taurus GN=FGFBP1 PE=1 SV=1	9.8534e+06	190329_636_MW_XY.raw	4	3
P07589	Fibronectin OS=Bos taurus GN=FN1 PE=1 SV=4	4.50839e+06	190329_636_MW_XY.raw	6	5
P02702	Folate receptor alpha OS=Bos taurus GN=FOLR1 PE=1 SV=3	1.5003e+07	190329_636_MW_XY.raw	6	2
Q3SX14	Gelsolin OS=Bos taurus GN=GSN PE=2 SV=1	1.4619e+07	190329_636_MW_XY.raw	13	7
P10096	Glyceraldehyde-3-phosphate dehydrogenase OS=Bos taurus GN=GAPDH PE=1 SV=4	2.22178e+06	190329_636_MW_XY.raw	3	3
P80195	Glycosylation-dependent cell adhesion molecule 1 OS=Bos taurus GN=GLYCAM1 PE=1 SV=2	7.92927e+08	190329_636_MW_XY.raw	44	9
P62871; P11017	Guanine nucleotide-binding protein G(I)/G(S)/G(T) subunit beta-1 OS=Bos taurus GN=GNB1 PE=1 SV=3; Guanine nucleotide-binding protein G(I)/G(S)/G(T) subunit beta-2 OS=Bos taurus GN=GNB2 PE=2 SV=3	1.37925e+07	190329_636_MW_XY.raw	6	3
P04695; P0C7Q4; P04696; P08239; P04896; P63097	Guanine nucleotide-binding protein G(t) subunit alpha-1 OS=Bos taurus GN=GNAT1 PE=1 SV=3; Guanine nucleotide-binding protein G(t) subunit alpha-3 OS=Bos taurus GN=GNAT3 PE=1 SV=1; Guanine nucleotide-binding protein G(t) subunit alpha-2 OS=Bos taurus GN=GNAT2 PE=2 SV=3; Guanine nucleotide-binding protein G(o) subunit alpha OS=Bos taurus GN=GNAO1 PE=1 SV=4; Guanine nucleotide-binding protein G(s) s…	3.70586e+06	190329_636_MW_XY.raw	3	1
Q2TBU0	Haptoglobin OS=Bos taurus GN=HP PE=2 SV=1	7.59918e+06	190329_636_MW_XY.raw	8	5
P19120	Heat shock cognate 71 kDa protein OS=Bos taurus GN=HSPA8 PE=1 SV=2	6.76973e+06	190329_636_MW_XY.raw	5	3
Q3SZV7	Hemopexin OS=Bos taurus GN=HPX PE=2 SV=1	4.75257e+06	190329_636_MW_XY.raw	4	2
P37980	Inorganic pyrophosphatase OS=Bos taurus GN=PPA1 PE=1 SV=2	1.39533e+06	190329_636_MW_XY.raw	2	2
Q0VCM5	Inter-alpha-trypsin inhibitor heavy chain H1 OS=Bos taurus GN=ITIH1 PE=1 SV=1	3.37702e+06	190329_636_MW_XY.raw	6	5
Q9XSG3	Isocitrate dehydrogenase [NADP] cytoplasmic OS=Bos taurus GN=IDH1 PE=2 SV=1	4.72094e+07	190329_636_MW_XY.raw	30	15
Q3ZBV1	IST1 homolog OS=Bos taurus GN=IST1 PE=2 SV=1	2.75599e+06	190329_636_MW_XY.raw	3	2
Q8SPJ1	Junction plakoglobin OS=Bos taurus GN=JUP PE=2 SV=1	1.02877e+06	190329_636_MW_XY.raw	2	2
P02668	Kappa-casein OS=Bos taurus GN=CSN3 PE=1 SV=1	2.88884e+10	190329_636_MW_XY.raw	158	8
P06394	Keratin, type I cytoskeletal 10 OS=Bos taurus GN=KRT10 PE=3 SV=1	2.88185e+08	190329_636_MW_XY.raw	40	10
A1L595; P06394	Keratin, type I cytoskeletal 17 OS=Bos taurus GN=KRT17 PE=2 SV=1; Keratin, type I cytoskeletal 10 OS=Bos taurus GN=KRT10 PE=3 SV=1	2.11748e+07	190329_636_MW_XY.raw	5	1
P08728; P05785; A1L595	Keratin, type I cytoskeletal 19 OS=Bos taurus GN=KRT19 PE=2 SV=1; Keratin, type I cytoskeletal 14 (Fragment) OS=Bos taurus GN=KRT14 PE=2 SV=1; Keratin, type I cytoskeletal 17 OS=Bos taurus GN=KRT17 PE=2 SV=1	2.97647e+06	190329_636_MW_XY.raw	3	1
Q0P5J4; Q0P5J6; Q148H6	Keratin, type I cytoskeletal 25 OS=Bos taurus GN=KRT25 PE=2 SV=1; Keratin, type I cytoskeletal 27 OS=Bos taurus GN=KRT27 PE=2 SV=1; Keratin, type I cytoskeletal 28 OS=Bos taurus GN=KRT28 PE=2 SV=1	9.2815e+06	190329_636_MW_XY.raw	3	1
Q0P5J4; Q0P5J6; Q148H6; P06394	Keratin, type I cytoskeletal 25 OS=Bos taurus GN=KRT25 PE=2 SV=1; Keratin, type I cytoskeletal 27 OS=Bos taurus GN=KRT27 PE=2 SV=1; Keratin, type I cytoskeletal 28 OS=Bos taurus GN=KRT28 PE=2 SV=1; Keratin, type I cytoskeletal 10 OS=Bos taurus GN=KRT10 PE=3 SV=1	4.28389e+07	190329_636_MW_XY.raw	6	1
A7YWM2; Q0P5J7; P08728; Q148H6; A1L595; P06394	Keratin, type I cytoskeletal 40 OS=Bos taurus GN=KRT40 PE=2 SV=1; Keratin, type I cuticular Ha5 OS=Bos taurus GN=KRT35 PE=2 SV=2; Keratin, type I cytoskeletal 19 OS=Bos taurus GN=KRT19 PE=2 SV=1; Keratin, type I cytoskeletal 28 OS=Bos taurus GN=KRT28 PE=2 SV=1; Keratin, type I cytoskeletal 17 OS=Bos taurus GN=KRT17 PE=2 SV=1; Keratin, type I cytoskeletal 10 OS=Bos taurus GN=KRT10 PE=3 SV=1	5.71676e+07	190329_636_MW_XY.raw	4	1
Q5XQN5	Keratin, type II cytoskeletal 5 OS=Bos taurus GN=KRT5 PE=1 SV=1	9.31784e+06	190329_636_MW_XY.raw	8	6
Q5XQN5; Q08D91; Q29S21	Keratin, type II cytoskeletal 5 OS=Bos taurus GN=KRT5 PE=1 SV=1; Keratin, type II cytoskeletal 75 OS=Bos taurus GN=KRT75 PE=2 SV=1; Keratin, type II cytoskeletal 7 OS=Bos taurus GN=KRT7 PE=2 SV=1	6.04983e+07	190329_636_MW_XY.raw	3	1
P04261; Q148H7; Q5XQN5; Q08D91; P04260; P04262; P05786	Keratin, type II cytoskeletal 60 kDa, component III (Fragment) OS=Bos taurus PE=2 SV=1; Keratin, type II cytoskeletal 79 OS=Bos taurus GN=KRT79 PE=2 SV=1; Keratin, type II cytoskeletal 5 OS=Bos taurus GN=KRT5 PE=1 SV=1; Keratin, type II cytoskeletal 75 OS=Bos taurus GN=KRT75 PE=2 SV=1; Keratin, type II cytoskeletal 59 kDa, component IV (Fragment) OS=Bos taurus PE=2 SV=1; Keratin, type II cytoskel…	1.24789e+07	190329_636_MW_XY.raw	7	2
A7YWK3; A3KN27; Q148H8; Q148H5; Q148H7; Q5XQN5; Q08D91; Q29S21; P05786	Keratin, type II cytoskeletal 73 OS=Bos taurus GN=KRT73 PE=2 SV=1; Keratin, type II cytoskeletal 74 OS=Bos taurus GN=KRT74 PE=2 SV=1; Keratin, type II cytoskeletal 72 OS=Bos taurus GN=KRT72 PE=2 SV=1; Keratin, type II cytoskeletal 71 OS=Bos taurus GN=KRT71 PE=2 SV=1; Keratin, type II cytoskeletal 79 OS=Bos taurus GN=KRT79 PE=2 SV=1; Keratin, type II cytoskeletal 5 OS=Bos taurus GN=KRT5 PE=1 SV=1;…	1.00018e+07	190329_636_MW_XY.raw	5	1
A7YWK3; A0JND2; P04263; Q28115; Q29S21	Keratin, type II cytoskeletal 73 OS=Bos taurus GN=KRT73 PE=2 SV=1; Keratin, type II cytoskeletal 80 OS=Bos taurus GN=KRT80 PE=2 SV=1; Keratin, type II cytoskeletal 68 kDa, component IA (Fragment) OS=Bos taurus PE=2 SV=1; Glial fibrillary acidic protein OS=Bos taurus GN=GFAP PE=1 SV=2; Keratin, type II cytoskeletal 7 OS=Bos taurus GN=KRT7 PE=2 SV=1	2.05177e+07	190329_636_MW_XY.raw	6	1
Q95114	Lactadherin OS=Bos taurus GN=MFGE8 PE=1 SV=2	2.15239e+09	190329_636_MW_XY.raw	149	26
P80025	Lactoperoxidase OS=Bos taurus GN=LPO PE=1 SV=1	5.42167e+08	190329_636_MW_XY.raw	87	29
P24627	Lactotransferrin OS=Bos taurus GN=LTF PE=1 SV=2	1.52731e+09	190329_636_MW_XY.raw	198	50
Q2TBI0	Lipopolysaccharide-binding protein OS=Bos taurus GN=LBP PE=2 SV=1	2.30892e+07	190329_636_MW_XY.raw	15	10
P11151	Lipoprotein lipase OS=Bos taurus GN=LPL PE=1 SV=2	8.34742e+08	190329_636_MW_XY.raw	58	16
Q29451	Lysosomal alpha-mannosidase OS=Bos taurus GN=MAN2B1 PE=1 SV=4	1.81166e+06	190329_636_MW_XY.raw	3	3
Q3T145	Malate dehydrogenase, cytoplasmic OS=Bos taurus GN=MDH1 PE=2 SV=3	1.12306e+06	190329_636_MW_XY.raw	2	2
Q6VE48	Membrane cofactor protein OS=Bos taurus GN=CD46 PE=1 SV=2	1.91416e+07	190329_636_MW_XY.raw	8	3
P79121	Metalloproteinase inhibitor 3 OS=Bos taurus GN=TIMP3 PE=2 SV=1	1.02599e+07	190329_636_MW_XY.raw	9	4
Q2HJ49; Q32LP2; P31976	Moesin OS=Bos taurus GN=MSN PE=2 SV=3; Radixin OS=Bos taurus GN=RDX PE=2 SV=1; Ezrin OS=Bos taurus GN=EZR PE=1 SV=2	1.91828e+07	190329_636_MW_XY.raw	11	4
Q95122	Monocyte differentiation antigen CD14 OS=Bos taurus GN=CD14 PE=2 SV=2	1.5337e+07	190329_636_MW_XY.raw	10	4
Q8WML4	Mucin-1 OS=Bos taurus GN=MUC1 PE=1 SV=1	3.43487e+07	190329_636_MW_XY.raw	8	5
Q8MI01	Mucin-15 OS=Bos taurus GN=MUC15 PE=1 SV=1	1.04618e+08	190329_636_MW_XY.raw	13	4
Q3SZK8	Na(+)/H(+) exchange regulatory cofactor NHE-RF1 OS=Bos taurus GN=SLC9A3R1 PE=2 SV=1	1.55703e+06	190329_636_MW_XY.raw	2	2
Q32KV6	Nucleotide exchange factor SIL1 OS=Bos taurus GN=SIL1 PE=2 SV=1	8.26952e+06	190329_636_MW_XY.raw	6	6
P62935	Peptidyl-prolyl cis-trans isomerase A OS=Bos taurus GN=PPIA PE=1 SV=2	1.31664e+07	190329_636_MW_XY.raw	7	4
P80311	Peptidyl-prolyl cis-trans isomerase B OS=Bos taurus GN=PPIB PE=1 SV=4	7.92515e+06	190329_636_MW_XY.raw	9	4
A4FV72; P62935	Peptidyl-prolyl cis-trans isomerase E OS=Bos taurus GN=PPIE PE=2 SV=1; Peptidyl-prolyl cis-trans isomerase A OS=Bos taurus GN=PPIA PE=1 SV=2	5.96962e+06	190329_636_MW_XY.raw	3	1
Q9TUM6	Perilipin-2 OS=Bos taurus GN=PLIN2 PE=2 SV=1	2.15046e+08	190329_636_MW_XY.raw	54	23
P13696	Phosphatidylethanolamine-binding protein 1 OS=Bos taurus GN=PEBP1 PE=1 SV=2	2.27225e+06	190329_636_MW_XY.raw	3	3
Q95121	Pigment epithelium-derived factor OS=Bos taurus GN=SERPINF1 PE=1 SV=1	3.06975e+06	190329_636_MW_XY.raw	3	3
P26201	Platelet glycoprotein 4 OS=Bos taurus GN=CD36 PE=1 SV=5	1.12925e+09	190329_636_MW_XY.raw	63	14
P81265	Polymeric immunoglobulin receptor OS=Bos taurus GN=PIGR PE=2 SV=1	2.38621e+09	190329_636_MW_XY.raw	227	35
P0CH28; P63048; P62992; P0CG53	Polyubiquitin-C OS=Bos taurus GN=UBC PE=1 SV=1; Ubiquitin-60S ribosomal protein L40 OS=Bos taurus GN=UBA52 PE=1 SV=2; Ubiquitin-40S ribosomal protein S27a OS=Bos taurus GN=RPS27A PE=1 SV=2; Polyubiquitin-B OS=Bos taurus GN=UBB PE=1 SV=1	1.56338e+07	190329_636_MW_XY.raw	7	3
P02584	Profilin-1 OS=Bos taurus GN=PFN1 PE=1 SV=2	2.17552e+06	190329_636_MW_XY.raw	3	2
P00978	Protein AMBP OS=Bos taurus GN=AMBP PE=1 SV=2	1.27672e+06	190329_636_MW_XY.raw	2	2
Q5E946	Protein deglycase DJ-1 OS=Bos taurus GN=PARK7 PE=2 SV=1	4.69939e+06	190329_636_MW_XY.raw	4	3
Q2KIT0	Protein HP-20 homolog OS=Bos taurus PE=2 SV=1	5.43124e+06	190329_636_MW_XY.raw	5	4
A6QR11	Protein kinase C-binding protein NELL2 OS=Bos taurus GN=NELL2 PE=2 SV=1	4.7554e+06	190329_636_MW_XY.raw	6	3
Q3MHX6	Protein OS-9 OS=Bos taurus GN=OS9 PE=2 SV=1	8.25529e+07	190329_636_MW_XY.raw	3	1
P55859	Purine nucleoside phosphorylase OS=Bos taurus GN=PNP PE=1 SV=3	2.70423e+06	190329_636_MW_XY.raw	4	2
P50397	Rab GDP dissociation inhibitor beta OS=Bos taurus GN=GDI2 PE=2 SV=3	2.66783e+07	190329_636_MW_XY.raw	16	9
P62998	Ras-related C3 botulinum toxin substrate 1 OS=Bos taurus GN=RAC1 PE=1 SV=1	6.33468e+06	190329_636_MW_XY.raw	4	3
Q9TU25; P62998	Ras-related C3 botulinum toxin substrate 2 OS=Bos taurus GN=RAC2 PE=2 SV=1; Ras-related C3 botulinum toxin substrate 1 OS=Bos taurus GN=RAC1 PE=1 SV=1	8.27539e+06	190329_636_MW_XY.raw	5	2
Q3MHP2; Q2TA29	Ras-related protein Rab-11B OS=Bos taurus GN=RAB11B PE=2 SV=3; Ras-related protein Rab-11A OS=Bos taurus GN=RAB11A PE=2 SV=3	1.70945e+07	190329_636_MW_XY.raw	9	5
Q1RMR4	Ras-related protein Rab-15 OS=Bos taurus GN=RAB15 PE=2 SV=1	9.90901e+06	190329_636_MW_XY.raw	5	1
Q1RMR4; Q2HJH2; Q58DS5; A4FV54; Q2HJI8	Ras-related protein Rab-15 OS=Bos taurus GN=RAB15 PE=2 SV=1; Ras-related protein Rab-1B OS=Bos taurus GN=RAB1B PE=2 SV=1; Ras-related protein Rab-13 OS=Bos taurus GN=RAB13 PE=1 SV=1; Ras-related protein Rab-8A OS=Bos taurus GN=RAB8A PE=2 SV=1; Ras-related protein Rab-8B OS=Bos taurus GN=RAB8B PE=2 SV=1	1.27861e+07	190329_636_MW_XY.raw	3	1
Q0IIG8	Ras-related protein Rab-18 OS=Bos taurus GN=RAB18 PE=2 SV=1	3.90632e+07	190329_636_MW_XY.raw	14	7
Q2HJH2	Ras-related protein Rab-1B OS=Bos taurus GN=RAB1B PE=2 SV=1	2.62705e+07	190329_636_MW_XY.raw	7	4
Q2HJH2; A4FV54; Q2HJI8	Ras-related protein Rab-1B OS=Bos taurus GN=RAB1B PE=2 SV=1; Ras-related protein Rab-8A OS=Bos taurus GN=RAB8A PE=2 SV=1; Ras-related protein Rab-8B OS=Bos taurus GN=RAB8B PE=2 SV=1	9.16994e+06	190329_636_MW_XY.raw	3	1
Q3T0F5	Ras-related protein Rab-7a OS=Bos taurus GN=RAB7A PE=2 SV=1	4.13068e+06	190329_636_MW_XY.raw	4	2
P61223; P62833	Ras-related protein Rap-1b OS=Bos taurus GN=RAP1B PE=2 SV=1; Ras-related protein Rap-1A OS=Bos taurus GN=RAP1A PE=1 SV=1	2.29132e+07	190329_636_MW_XY.raw	7	4
Q1RMJ6; Q3ZBW5; P61585	Rho-related GTP-binding protein RhoC OS=Bos taurus GN=RHOC PE=2 SV=1; Rho-related GTP-binding protein RhoB OS=Bos taurus GN=RHOB PE=2 SV=1; Transforming protein RhoA OS=Bos taurus GN=RHOA PE=1 SV=1	8.48571e+06	190329_636_MW_XY.raw	3	2
Q1RMJ6; P61585	Rho-related GTP-binding protein RhoC OS=Bos taurus GN=RHOC PE=2 SV=1; Transforming protein RhoA OS=Bos taurus GN=RHOA PE=1 SV=1	1.50495e+07	190329_636_MW_XY.raw	4	3
A0JNP2	Secretoglobin family 1D member OS=Bos taurus GN=SCGB1D PE=3 SV=2	6.92186e+07	190329_636_MW_XY.raw	11	2
F1N152	Serine protease HTRA1 OS=Bos taurus GN=HTRA1 PE=2 SV=1	3.91982e+06	190329_636_MW_XY.raw	6	3
Q29443	Serotransferrin OS=Bos taurus GN=TF PE=2 SV=1	1.01257e+08	190329_636_MW_XY.raw	46	24
Q29443; P24627	Serotransferrin OS=Bos taurus GN=TF PE=2 SV=1; Lactotransferrin OS=Bos taurus GN=LTF PE=1 SV=2	3.75791e+07	190329_636_MW_XY.raw	5	2
P02769	Serum albumin OS=Bos taurus GN=ALB PE=1 SV=4	7.5608e+08	190329_636_MW_XY.raw	133	42
Q3SZU5	Signal peptidase complex subunit 3 OS=Bos taurus GN=SPCS3 PE=2 SV=1	2.63525e+06	190329_636_MW_XY.raw	2	2
Q27960	Sodium-dependent phosphate transport protein 2B OS=Bos taurus GN=SLC34A2 PE=1 SV=1	2.26044e+08	190329_636_MW_XY.raw	30	11
P29392	Spermadhesin-1 OS=Bos taurus GN=SPADH1 PE=1 SV=1	3.89805e+06	190329_636_MW_XY.raw	2	2
Q3T000	Synaptobrevin homolog YKT6 OS=Bos taurus GN=YKT6 PE=2 SV=1	4.61839e+06	190329_636_MW_XY.raw	6	4
Q28178	Thrombospondin-1 OS=Bos taurus GN=THBS1 PE=2 SV=2	3.56911e+06	190329_636_MW_XY.raw	5	4
Q95LA9	Toll-like receptor 2 OS=Bos taurus GN=TLR2 PE=2 SV=1	3.76583e+06	190329_636_MW_XY.raw	6	3
P80457	Xanthine dehydrogenase/oxidase OS=Bos taurus GN=XDH PE=1 SV=4	1.71972e+09	190329_636_MW_XY.raw	164	54
P63103; Q0VC36; P68509; P68252; P68250; Q3SZI4; P62261	14-3-3 protein zeta/delta OS=Bos taurus GN=YWHAZ PE=1 SV=1; 14-3-3 protein sigma OS=Bos taurus GN=SFN PE=2 SV=1; 14-3-3 protein eta OS=Bos taurus GN=YWHAH PE=1 SV=2; 14-3-3 protein gamma OS=Bos taurus GN=YWHAG PE=1 SV=2; 14-3-3 protein beta/alpha OS=Bos taurus GN=YWHAB PE=1 SV=2; 14-3-3 protein theta OS=Bos taurus GN=YWHAQ PE=2 SV=1; 14-3-3 protein epsilon OS=Bos taurus GN=YWHAE PE=2 SV=1	866426	190329_636_MW_XY.raw	1	1
Q3T0E5	Adipocyte plasma membrane-associated protein OS=Bos taurus GN=APMAP PE=2 SV=1	553139	190329_636_MW_XY.raw	1	1
Q5E9I6; P84080; P84081	ADP-ribosylation factor 3 OS=Bos taurus GN=ARF3 PE=2 SV=3; ADP-ribosylation factor 1 OS=Bos taurus GN=ARF1 PE=1 SV=2; ADP-ribosylation factor 2 OS=Bos taurus GN=ARF2 PE=2 SV=1	1.98813e+06	190329_636_MW_XY.raw	2	1
Q5E9I6; P84080; P84081; Q3SZF2	ADP-ribosylation factor 3 OS=Bos taurus GN=ARF3 PE=2 SV=3; ADP-ribosylation factor 1 OS=Bos taurus GN=ARF1 PE=1 SV=2; ADP-ribosylation factor 2 OS=Bos taurus GN=ARF2 PE=2 SV=1; ADP-ribosylation factor 4 OS=Bos taurus GN=ARF4 PE=2 SV=3	5.55552e+06	190329_636_MW_XY.raw	2	1
A7YY28	Alpha/beta hydrolase domain-containing protein 14B OS=Bos taurus GN=ABHD14B PE=2 SV=1	562007	190329_636_MW_XY.raw	1	1
P46193	Annexin A1 OS=Bos taurus GN=ANXA1 PE=2 SV=2	487323	190329_636_MW_XY.raw	1	1
P20072	Annexin A7 OS=Bos taurus GN=ANXA7 PE=1 SV=2	409487	190329_636_MW_XY.raw	1	1
P41361	Antithrombin-III OS=Bos taurus GN=SERPINC1 PE=1 SV=2	587863	190329_636_MW_XY.raw	1	1
Q32PJ2	Apolipoprotein A-IV OS=Bos taurus GN=APOA4 PE=2 SV=1	373706	190329_636_MW_XY.raw	1	1
P01888	Beta-2-microglobulin OS=Bos taurus GN=B2M PE=1 SV=2	876478	190329_636_MW_XY.raw	1	1
Q29RI6	Calcium-binding protein 39 OS=Bos taurus GN=CAB39 PE=2 SV=1	356236	190329_636_MW_XY.raw	1	1
Q2KIG3	Carboxypeptidase B2 OS=Bos taurus GN=CPB2 PE=1 SV=1	840619	190329_636_MW_XY.raw	1	1
Q9XSK2	CD63 antigen OS=Bos taurus GN=CD63 PE=2 SV=4	2.70707e+06	190329_636_MW_XY.raw	1	1
F1MN90	Cell death activator CIDE-3 OS=Bos taurus GN=CIDEC PE=2 SV=1	1.5581e+06	190329_636_MW_XY.raw	2	1
Q2KJ93	Cell division control protein 42 homolog OS=Bos taurus GN=CDC42 PE=1 SV=1	951184	190329_636_MW_XY.raw	1	1
Q08DB0	Centrosomal protein of 44 kDa OS=Bos taurus GN=CEP44 PE=2 SV=1	1.90101e+06	190329_636_MW_XY.raw	1	1
Q29RU4	Complement component C6 OS=Bos taurus GN=C6 PE=2 SV=1	370533	190329_636_MW_XY.raw	1	1
P25417; P35478	Cystatin-B OS=Bos taurus GN=CSTB PE=1 SV=1; Stefin-C OS=Bos taurus PE=1 SV=1	875908	190329_636_MW_XY.raw	1	1
P01035	Cystatin-C OS=Bos taurus GN=CST3 PE=1 SV=2	1.83027e+06	190329_636_MW_XY.raw	2	1
Q10741	Disintegrin and metalloproteinase domain-containing protein 10 OS=Bos taurus GN=ADAM10 PE=1 SV=1	406091	190329_636_MW_XY.raw	1	1
P68103	Elongation factor 1-alpha 1 OS=Bos taurus GN=EEF1A1 PE=1 SV=1	1.54425e+06	190329_636_MW_XY.raw	2	1
Q3SYU2	Elongation factor 2 OS=Bos taurus GN=EEF2 PE=2 SV=3	1.30506e+06	190329_636_MW_XY.raw	2	1
Q2HJD5	Ethylmalonyl-CoA decarboxylase OS=Bos taurus GN=ECHDC1 PE=2 SV=1	537062	190329_636_MW_XY.raw	1	1
P10790; P48035; P02690	Fatty acid-binding protein, heart OS=Bos taurus GN=FABP3 PE=1 SV=2; Fatty acid-binding protein, adipocyte OS=Bos taurus GN=FABP4 PE=2 SV=2; Myelin P2 protein OS=Bos taurus GN=PMP2 PE=1 SV=2	7.73476e+07	190329_636_MW_XY.raw	2	1
P10790; Q09139	Fatty acid-binding protein, heart OS=Bos taurus GN=FABP3 PE=1 SV=2; Fatty acid-binding protein, brain OS=Bos taurus GN=FABP7 PE=1 SV=2	2.13812e+07	190329_636_MW_XY.raw	1	1
Q2TBT7	Fragile X mental retardation syndrome-related protein 1 OS=Bos taurus GN=FXR1 PE=2 SV=1	4.50336e+06	190329_636_MW_XY.raw	1	1
Q2KJE5; P10096	Glyceraldehyde-3-phosphate dehydrogenase, testis-specific OS=Bos taurus GN=GAPDHS PE=2 SV=1; Glyceraldehyde-3-phosphate dehydrogenase OS=Bos taurus GN=GAPDH PE=1 SV=4	217812	190329_636_MW_XY.raw	1	1
Q5EA88	Glycerol-3-phosphate dehydrogenase [NAD(+)], cytoplasmic OS=Bos taurus GN=GPD1 PE=2 SV=3	822424	190329_636_MW_XY.raw	1	1
Q2YDG0	G-protein coupled receptor family C group 5 member C OS=Bos taurus GN=GPRC5C PE=2 SV=2	606753	190329_636_MW_XY.raw	1	1
Q3T0T7; Q3T0D7	GTP-binding protein SAR1b OS=Bos taurus GN=SAR1B PE=2 SV=1; GTP-binding protein SAR1a OS=Bos taurus GN=SAR1A PE=2 SV=1	1.1685e+06	190329_636_MW_XY.raw	1	1
P11017	Guanine nucleotide-binding protein G(I)/G(S)/G(T) subunit beta-2 OS=Bos taurus GN=GNB2 PE=2 SV=3	845450	190329_636_MW_XY.raw	1	1
Q27975; Q27965	Heat shock 70 kDa protein 1A OS=Bos taurus GN=HSPA1A PE=1 SV=2; Heat shock 70 kDa protein 1B OS=Bos taurus GN=HSPA1B PE=2 SV=1	658786	190329_636_MW_XY.raw	1	1
P19120; P0CB32; Q27975; Q27965; P34933	Heat shock cognate 71 kDa protein OS=Bos taurus GN=HSPA8 PE=1 SV=2; Heat shock 70 kDa protein 1-like OS=Bos taurus GN=HSPA1L PE=3 SV=1; Heat shock 70 kDa protein 1A OS=Bos taurus GN=HSPA1A PE=1 SV=2; Heat shock 70 kDa protein 1B OS=Bos taurus GN=HSPA1B PE=2 SV=1; Heat shock-related 70 kDa protein 2 OS=Bos taurus GN=HSPA2 PE=2 SV=2	2.15458e+06	190329_636_MW_XY.raw	2	1
P19120; P0CB32; Q27975; Q27965; P34933; Q0VCX2	Heat shock cognate 71 kDa protein OS=Bos taurus GN=HSPA8 PE=1 SV=2; Heat shock 70 kDa protein 1-like OS=Bos taurus GN=HSPA1L PE=3 SV=1; Heat shock 70 kDa protein 1A OS=Bos taurus GN=HSPA1A PE=1 SV=2; Heat shock 70 kDa protein 1B OS=Bos taurus GN=HSPA1B PE=2 SV=1; Heat shock-related 70 kDa protein 2 OS=Bos taurus GN=HSPA2 PE=2 SV=2; 78 kDa glucose-regulated protein OS=Bos taurus GN=HSPA5 PE=2 SV=1	2.61981e+06	190329_636_MW_XY.raw	1	1
P19120; P34933	Heat shock cognate 71 kDa protein OS=Bos taurus GN=HSPA8 PE=1 SV=2; Heat shock-related 70 kDa protein 2 OS=Bos taurus GN=HSPA2 PE=2 SV=2	1.66846e+06	190329_636_MW_XY.raw	1	1
P02081; P02070	Hemoglobin fetal subunit beta OS=Bos taurus PE=1 SV=1; Hemoglobin subunit beta OS=Bos taurus GN=HBB PE=1 SV=1	1.63275e+06	190329_636_MW_XY.raw	1	1
Q9MYY0	Heparanase OS=Bos taurus GN=HPSE PE=2 SV=2	574861	190329_636_MW_XY.raw	1	1
A1A4R1; Q32LA7; P0C0S4; Q3ZBX9; P0C0S9	Histone H2A type 2-C OS=Bos taurus GN=HIST2H2AC PE=2 SV=1; Histone H2A.V OS=Bos taurus GN=H2AFV PE=2 SV=3; Histone H2A.Z OS=Bos taurus GN=H2AFZ PE=1 SV=2; Histone H2A.J OS=Bos taurus GN=H2AFJ PE=2 SV=1; Histone H2A type 1 OS=Bos taurus PE=1 SV=2	501580	190329_636_MW_XY.raw	1	1
P62803	Histone H4 OS=Bos taurus PE=1 SV=2	651446	190329_636_MW_XY.raw	1	1
Q3T052	Inter-alpha-trypsin inhibitor heavy chain H4 OS=Bos taurus GN=ITIH4 PE=1 SV=1	889599	190329_636_MW_XY.raw	1	1
A1L595	Keratin, type I cytoskeletal 17 OS=Bos taurus GN=KRT17 PE=2 SV=1	476227	190329_636_MW_XY.raw	1	1
P08728; A1L595	Keratin, type I cytoskeletal 19 OS=Bos taurus GN=KRT19 PE=2 SV=1; Keratin, type I cytoskeletal 17 OS=Bos taurus GN=KRT17 PE=2 SV=1	2.33712e+06	190329_636_MW_XY.raw	1	1
Q08D91; Q29S21; P05786	Keratin, type II cytoskeletal 75 OS=Bos taurus GN=KRT75 PE=2 SV=1; Keratin, type II cytoskeletal 7 OS=Bos taurus GN=KRT7 PE=2 SV=1; Keratin, type II cytoskeletal 8 OS=Bos taurus GN=KRT8 PE=2 SV=3	3.14463e+06	190329_636_MW_XY.raw	2	1
Q148H7	Keratin, type II cytoskeletal 79 OS=Bos taurus GN=KRT79 PE=2 SV=1	3.75211e+07	190329_636_MW_XY.raw	2	1
Q148H7; Q5XQN5; Q08D91	Keratin, type II cytoskeletal 79 OS=Bos taurus GN=KRT79 PE=2 SV=1; Keratin, type II cytoskeletal 5 OS=Bos taurus GN=KRT5 PE=1 SV=1; Keratin, type II cytoskeletal 75 OS=Bos taurus GN=KRT75 PE=2 SV=1	3.38753e+06	190329_636_MW_XY.raw	1	1
Q95M12	Legumain OS=Bos taurus GN=LGMN PE=1 SV=1	392022	190329_636_MW_XY.raw	1	1
Q1JPB0	Leukocyte elastase inhibitor OS=Bos taurus GN=SERPINB1 PE=2 SV=2	599628	190329_636_MW_XY.raw	1	1
P80177	Macrophage migration inhibitory factor OS=Bos taurus GN=MIF PE=1 SV=6	2.47092e+06	190329_636_MW_XY.raw	1	1
Q3T0N1	Multivesicular body subunit 12A OS=Bos taurus GN=MVB12A PE=2 SV=1	3.22976e+06	190329_636_MW_XY.raw	1	1
P07514	NADH-cytochrome b5 reductase 3 OS=Bos taurus GN=CYB5R3 PE=1 SV=3	1.4119e+06	190329_636_MW_XY.raw	2	1
Q08E11; P80311	Peptidyl-prolyl cis-trans isomerase C OS=Bos taurus GN=PPIC PE=2 SV=1; Peptidyl-prolyl cis-trans isomerase B OS=Bos taurus GN=PPIB PE=1 SV=4	531517	190329_636_MW_XY.raw	1	1
P18203	Peptidyl-prolyl cis-trans isomerase FKBP1A OS=Bos taurus GN=FKBP1A PE=1 SV=2	2.3942e+06	190329_636_MW_XY.raw	2	1
Q5E947; Q9BGI2	Peroxiredoxin-1 OS=Bos taurus GN=PRDX1 PE=2 SV=1; Peroxiredoxin-4 OS=Bos taurus GN=PRDX4 PE=2 SV=1	586567	190329_636_MW_XY.raw	1	1
Q29437	Primary amine oxidase, liver isozyme OS=Bos taurus PE=1 SV=1	790958	190329_636_MW_XY.raw	1	1
A6QNM8	Probable threonine--tRNA ligase 2, cytoplasmic OS=Bos taurus GN=TARSL2 PE=2 SV=1	404507	190329_636_MW_XY.raw	1	1
O02853	Prostaglandin-H2 D-isomerase OS=Bos taurus GN=PTGDS PE=1 SV=1	2.15142e+06	190329_636_MW_XY.raw	1	1
Q2KIX7	Protein HP-25 homolog 1 OS=Bos taurus PE=1 SV=1	966043	190329_636_MW_XY.raw	1	1
P02638	Protein S100-B OS=Bos taurus GN=S100B PE=1 SV=2	1.70085e+06	190329_636_MW_XY.raw	1	1
Q3T0A9	Protein shisa-5 OS=Bos taurus GN=SHISA5 PE=2 SV=1	1.70507e+06	190329_636_MW_XY.raw	1	1
Q0II59	Pyridoxal kinase OS=Bos taurus GN=PDXK PE=2 SV=1	452346	190329_636_MW_XY.raw	1	1
P21856	Rab GDP dissociation inhibitor alpha OS=Bos taurus GN=GDI1 PE=1 SV=1	370045	190329_636_MW_XY.raw	1	1
Q9TU25; Q2KJ93; P62998	Ras-related C3 botulinum toxin substrate 2 OS=Bos taurus GN=RAC2 PE=2 SV=1; Cell division control protein 42 homolog OS=Bos taurus GN=CDC42 PE=1 SV=1; Ras-related C3 botulinum toxin substrate 1 OS=Bos taurus GN=RAC1 PE=1 SV=1	2.31255e+06	190329_636_MW_XY.raw	1	1
P10949; P10948	Ras-related protein Rab-3C OS=Bos taurus GN=RAB3C PE=2 SV=3; Ras-related protein Rab-3B OS=Bos taurus GN=RAB3B PE=2 SV=1	595323	190329_636_MW_XY.raw	1	1
P10949; P10948; P11023	Ras-related protein Rab-3C OS=Bos taurus GN=RAB3C PE=2 SV=3; Ras-related protein Rab-3B OS=Bos taurus GN=RAB3B PE=2 SV=1; Ras-related protein Rab-3A OS=Bos taurus GN=RAB3A PE=1 SV=3	709890	190329_636_MW_XY.raw	2	1
P10949; P10948; P11023; Q58DS5; A4FV54; Q2HJI8	Ras-related protein Rab-3C OS=Bos taurus GN=RAB3C PE=2 SV=3; Ras-related protein Rab-3B OS=Bos taurus GN=RAB3B PE=2 SV=1; Ras-related protein Rab-3A OS=Bos taurus GN=RAB3A PE=1 SV=3; Ras-related protein Rab-13 OS=Bos taurus GN=RAB13 PE=1 SV=1; Ras-related protein Rab-8A OS=Bos taurus GN=RAB8A PE=2 SV=1; Ras-related protein Rab-8B OS=Bos taurus GN=RAB8B PE=2 SV=1	1.47562e+06	190329_636_MW_XY.raw	1	1
Q58DS9	Ras-related protein Rab-5C OS=Bos taurus GN=RAB5C PE=2 SV=1	670387	190329_636_MW_XY.raw	1	1
Q58DS9; Q0IIG7	Ras-related protein Rab-5C OS=Bos taurus GN=RAB5C PE=2 SV=1; Ras-related protein Rab-5A OS=Bos taurus GN=RAB5A PE=2 SV=1	1.35566e+06	190329_636_MW_XY.raw	1	1
A4FV54	Ras-related protein Rab-8A OS=Bos taurus GN=RAB8A PE=2 SV=1	1.1263e+06	190329_636_MW_XY.raw	1	1
P61223	Ras-related protein Rap-1b OS=Bos taurus GN=RAP1B PE=2 SV=1	1.52477e+06	190329_636_MW_XY.raw	2	1
P81134	Renin receptor OS=Bos taurus GN=ATP6AP2 PE=1 SV=2	994869	190329_636_MW_XY.raw	2	1
P19803	Rho GDP-dissociation inhibitor 1 OS=Bos taurus GN=ARHGDIA PE=1 SV=3	1.6471e+06	190329_636_MW_XY.raw	1	1
Q9TTE1; A2I7N2; A2I7N0; A2I7M9; A2I7N1; A6QPQ2; Q3ZEJ6	Serpin A3-1 OS=Bos taurus GN=SERPINA3-1 PE=1 SV=3; Serpin A3-6 OS=Bos taurus GN=SERPINA3-6 PE=3 SV=1; Serpin A3-4 OS=Bos taurus GN=SERPINA3-4 PE=3 SV=1; Serpin A3-2 OS=Bos taurus GN=SERPINA3-2 PE=3 SV=1; Serpin A3-5 OS=Bos taurus GN=SERPINA3-5 PE=3 SV=1; Serpin A3-8 OS=Bos taurus GN=SERPINA3-8 PE=2 SV=1; Serpin A3-3 OS=Bos taurus GN=SERPINA3-3 PE=1 SV=2	657810	190329_636_MW_XY.raw	1	1
Q9TTE1; A2I7N3; A2I7M9; A2I7N1	Serpin A3-1 OS=Bos taurus GN=SERPINA3-1 PE=1 SV=3; Serpin A3-7 OS=Bos taurus GN=SERPINA3-7 PE=3 SV=1; Serpin A3-2 OS=Bos taurus GN=SERPINA3-2 PE=3 SV=1; Serpin A3-5 OS=Bos taurus GN=SERPINA3-5 PE=3 SV=1	2.04754e+06	190329_636_MW_XY.raw	1	1
A2I7N3	Serpin A3-7 OS=Bos taurus GN=SERPINA3-7 PE=3 SV=1	1.62079e+06	190329_636_MW_XY.raw	1	1
P00442	Superoxide dismutase [Cu-Zn] OS=Bos taurus GN=SOD1 PE=1 SV=2	868225	190329_636_MW_XY.raw	1	1
Q2LGB5	Toll-interacting protein OS=Bos taurus GN=TOLLIP PE=2 SV=1	355317	190329_636_MW_XY.raw	1	1
P21214	Transforming growth factor beta-2 OS=Bos taurus GN=TGFB2 PE=1 SV=3	668272	190329_636_MW_XY.raw	2	1
Q6B855	Transketolase OS=Bos taurus GN=TKT PE=2 SV=1	584239	190329_636_MW_XY.raw	1	1
Q3T110	Transmembrane 4 L6 family member 18 OS=Bos taurus GN=TM4SF18 PE=2 SV=1	1.52217e+06	190329_636_MW_XY.raw	2	1
Q0V8B6	Tripeptidyl-peptidase 1 OS=Bos taurus GN=TPP1 PE=2 SV=1	710657	190329_636_MW_XY.raw	1	1
P17248	Tryptophan--tRNA ligase, cytoplasmic OS=Bos taurus GN=WARS PE=1 SV=3	1.27688e+06	190329_636_MW_XY.raw	1	1
Q3T0Y8	Vesicle-associated membrane protein 8 OS=Bos taurus GN=VAMP8 PE=3 SV=1	1.52997e+06	190329_636_MW_XY.raw	2	1
		8.5699e+10	intensity sum of all proteins
		8.54621e+10	intensity sum of 132 hi-confidence proteins
