# Supplementary figures and images for: Milk exosomes with enhanced mucus penetrability for oral delivery of siRNA
Source: Royal Society of Chemistry journal article supplement (doi:10.1039/d0bm01497d), 2020-12-08

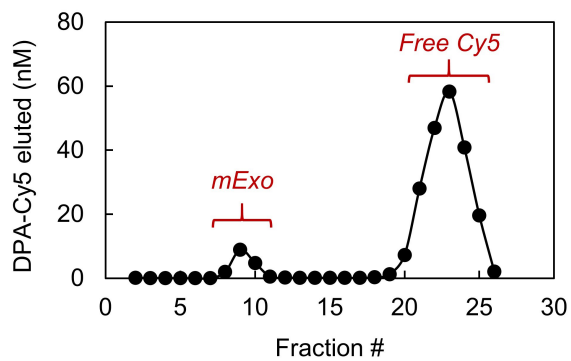

Supplement: d0bm01497d1.pdf [file d0bm01497d1.pdf]

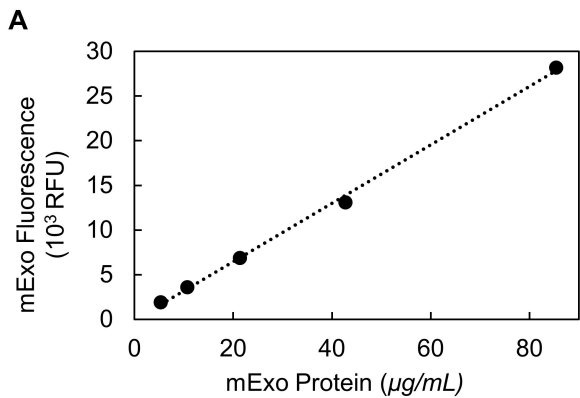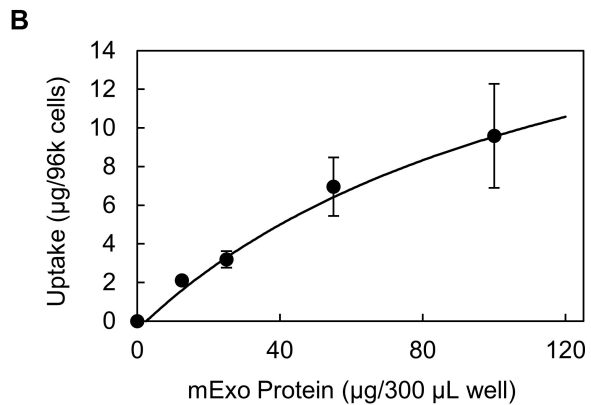

Supplement: d0bm01497d2.pdf [file d0bm01497d2.pdf]

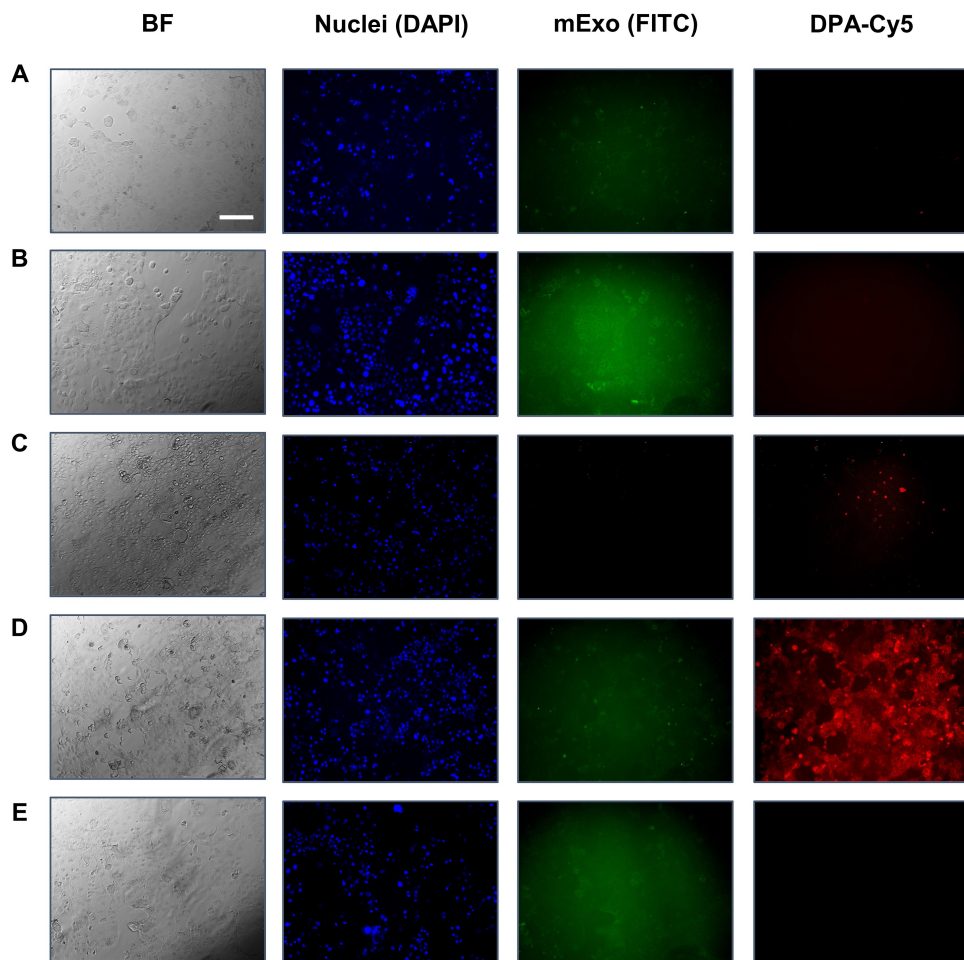

Supplement: d0bm01497d3.pdf [file d0bm01497d3.pdf]

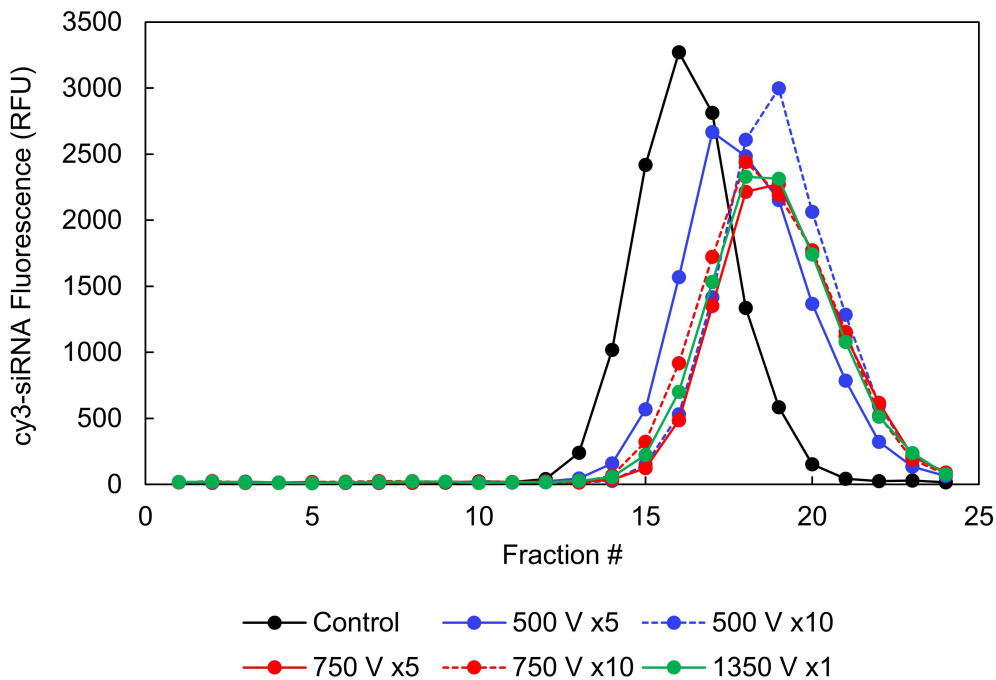

Supplement: d0bm01497d4.pdf [file d0bm01497d4.pdf]
